# Supplementary material for: Glutaminase 2 negatively regulates the PI3K/AKT signaling and shows tumor suppression activity in human hepatocellular carcinoma
Source: PubMed Central journal article supplement (PMC4058033; doi:10.18632/oncotarget.1862), 2014-03-26

## Supplementary Information

**Supplementary Table S1. The GLS2 protein expression in 110 HCC specimens**

| Clinico-pathological characteristic | Categorisation | n (%)     | GLS2 expression |    |   | <i>p</i> |
|-------------------------------------|----------------|-----------|-----------------|----|---|----------|
|                                     |                |           | -               | ±  | + |          |
| Age                                 | <55 years      | 70 (63.6) | 61              | 5  | 4 | >0.05    |
|                                     | ≥55 years      | 40 (36.4) | 35              | 5  | 0 |          |
| Gender                              | Female         | 26 (23.6) | 25              | 0  | 1 | >0.05    |
|                                     | male           | 84 (76.4) | 71              | 10 | 3 |          |
| Tumor stage                         | I              | 1 ( 0.9)  | 1               | 0  | 0 | >0.05    |
|                                     | II             | 50 (45.5) | 45              | 4  | 1 |          |
|                                     | III            | 59 (53.6) | 50              | 6  | 3 |          |
| Histological grade                  | 1              | 6 ( 5.4)  | 5               | 0  | 1 | >0.05    |
|                                     | 2              | 65 (59.1) | 57              | 7  | 1 |          |
|                                     | 3              | 31 (28.2) | 27              | 2  | 2 |          |
|                                     | NA             | 8 ( 7.3)  | 7               | 1  | 0 |          |

The GLS2 protein expression in 110 HCC specimens in three TMAs (US Biomax ) was determined by IHC assays. -: 0% positive staining cells; ±: <10% positive staining cells; +: ≥10% positive staining cells. The *p* values were calculated using  $\chi^2$  tests. NA: Information not available.

**Supplementary Table S2. The GLS2 protein expression in 125 non-tumor specimens**

| Clinico-pathological characteristic | Categorisation | n (%)     | GLS2 expression |   |    | <i>p</i> |
|-------------------------------------|----------------|-----------|-----------------|---|----|----------|
|                                     |                |           | -               | ± | +  |          |
| Age                                 | <55 years      | 88 (70.4) | 0               | 5 | 83 | >0.05    |
|                                     | ≥55 years      | 37 (29.6) | 0               | 2 | 35 |          |
| Gender                              | Female         | 31 (24.8) | 0               | 2 | 29 | >0.05    |
|                                     | Male           | 94 (75.2) | 0               | 5 | 89 |          |
| Pathology                           | Cirrhosis      | 43 (34.4) | 0               | 2 | 41 | >0.05    |
|                                     | Hepatitis      | 12 (9.6)  | 0               | 1 | 11 |          |
|                                     | Normal         | 70 (56)   | 0               | 4 | 66 |          |

The GLS2 protein expression in 125 non-tumor specimens in three TMA (US Biomax) was determined by IHC assays. -: 0% positive staining cells; ±: <10% positive staining cells; +: ≥10% positive staining cells. The *p* values were calculated using  $\chi^2$  tests.

**Supplementary Table S3. The GLS2 protein expression in 21 HCC specimens**

| Clinico-pathological characteristic | Categorisation | n (%)   | GLS2 expression |   |   | <i>p</i> |
|-------------------------------------|----------------|---------|-----------------|---|---|----------|
|                                     |                |         | -               | ± | + |          |
| Age                                 | <55 years      | 5 (24)  | 4               | 0 | 1 | >0.05    |
|                                     | ≥55 years      | 16 (76) | 15              | 1 | 0 |          |
| Gender                              | Female         | 6 (28)  | 5               | 0 | 0 | >0.05    |
|                                     | male           | 15 (72) | 14              | 1 | 1 |          |
| Tumor stage                         | I              | 5 (24)  | 4               | 0 | 1 | >0.05    |
|                                     | II             | 12 (57) | 11              | 1 | 0 |          |
|                                     | III            | 4 (19)  | 4               | 0 | 0 |          |
| Histological grade                  | 1              | 1 (5)   | 1               | 0 | 0 | >0.05    |
|                                     | 2              | 10 (47) | 9               | 0 | 1 |          |
|                                     | 3              | 8 (38)  | 7               | 1 | 0 |          |
|                                     | 4              | 2 (9)   | 2               | 0 | 0 |          |

The GLS2 protein expression in 21 HCC specimens (MD Anderson Cancer Center) was determined by IHC assays. -: 0% positive staining cells; ±: <10% positive staining cells; +: ≥10% positive staining cells. The *p* values were calculated using  $\chi^2$  tests.

### Supplementary Figure Legend:

#### Supplementary Figure S1: The down-regulation of GLS2 expression in human primary

**HCCs.** Twenty-one pairs of primary HCCs and their matched adjacent non-tumor liver tissues were collected at MD Anderson Cancer Center. (A) The GLS2 expression in HCCs measured by IHC assays. Left panel: Representative IHC staining of GLS2 in 2 HCCs which showed negative staining (-) and matched non-tumor liver tissues, which showed positive staining (+). Right panel: IHC staining results of 21 HCCs and their adjacent non-tumor tissues. -: 0% positive staining cells; ±: <10% positive staining cells; +: >10% positive staining cells. The *p* values were calculated using  $\chi^2$  tests. (B) The GLS2 mRNA levels were measured by Taqman real-time PCR assays and normalized with Actin. The relative GLS2 mRNA levels in HCCs and their adjacent non-tumor liver tissues were calculated by comparing with the GLS2 mRNA levels in the adjacent liver tissue of HCC #1, which were designated as 1. Data are presented as mean  $\pm$  SD (n = 3).

Supplementary Figure S1

**A**

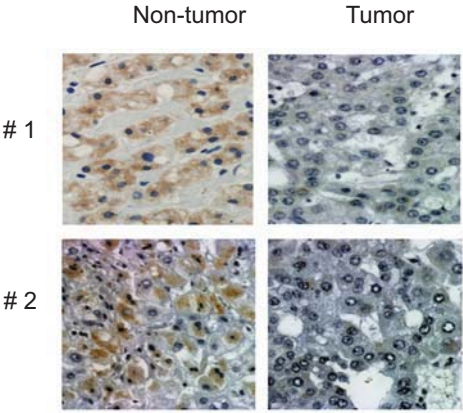

| GLS2 staining | Non-tumor | Tumor |
|---------------|-----------|-------|
|               | n         | n     |
| -             | 0         | 19    |
| ±             | 1         | 1     |
| +             | 20        | 1     |
| Total         | 21        | 21    |

$p < 0.0001, \chi^2$  test

**B**

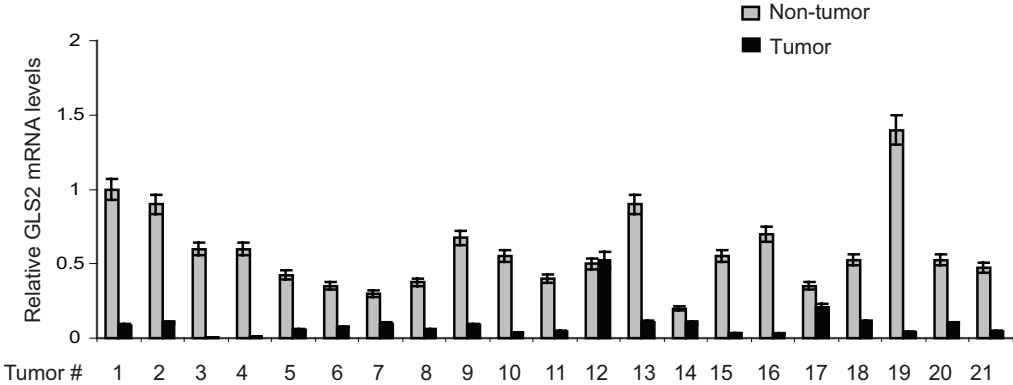

Supplement: oncotarget-05-2635-s001.pdf [file oncotarget-05-2635-s001.pdf]
